# Supplementary material for: Endocannabinoid signaling in the lateral habenula regulates pain and alcohol consumption
Source: PubMed Central journal article supplement (PMC8046806; doi:10.1038/s41398-021-01337-3), 2021-04-14

Supplementary Figure 2

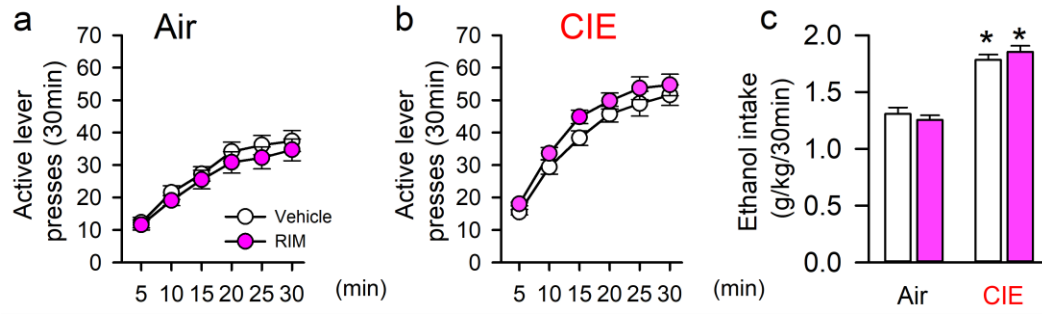

Supplement: 41398_2021_1337_MOESM4_ESM.pdf [file 41398_2021_1337_MOESM4_ESM.pdf]
